# Supplementary material for: Dual-mode color tuning based on upconversion core/triple-shell nanostructure
Source: Royal Society of Chemistry journal article supplement (doi:10.1039/c8tc05467c), 2019-01-01
Supplement: c8tc05467c1.pdf [file c8tc05467c1.pdf]

## Supporting information

# Dual-mode color tuning based on upconversion core/triple-shell nanostructure

Lei Lei,<sup>†a</sup> Xiaoru Dai,<sup>†a</sup> Yao Cheng,<sup>\*b</sup> Yuansheng Wang,<sup>b</sup> Zhen Xiao,<sup>a</sup> Shiqing Xu<sup>\*a</sup>

<sup>a</sup> College of Materials Science and Engineering, China Jiliang University, Hangzhou 310018, P. R. China. \* E-Mail: shiqingxu@cjlu.edu.cn.

<sup>b</sup> CAS Key Laboratory of Design and Assembly of Functional Nanostructures, and Fujian Key Laboratory of Nanomaterials, Fujian Institute of Research on the Structure of Matter, Chinese Academy of Sciences, Fuzhou, Fujian, 350002, P. R. China.

\* E-mail: chengyao@fjirsm.ac.cn

<sup>†</sup> Lei Lei and Xiaoru Dai contributed equally to this work.

### Experimental section

**Synthesis of NaErF<sub>4</sub> NCs.** Er(Ac)<sub>3</sub> (0.8 mmol) and NaAc (0.8 mmol) were added into a 50 mL three-necked bottle containing 8 mL OA. The mixture was heated at 155 °C for 30 min to remove water from the solution. Then 12 mL ODE was quickly added to the above solution and the resulted mixture was heated at 150 °C for another 30 min to form a clear solution, and then cooled down to room temperature. Afterwards, 8 mL methanol solution containing NH<sub>4</sub>F (3 mmol) was added and the solution was stirred at 60 °C for 30 min. After the methanol was evaporated, the solution was further heated at 290 °C under N<sub>2</sub> for 120 min and then cooled down to

room temperature. The products were precipitated by addition of ethanol, collected by centrifugation, washed with methanol and ethanol for three times, and finally re-dispersed in 4 mL cyclohexane. The preparation of NaErF<sub>4</sub>: 2Eu and NaErF<sub>4</sub>: 5Yb NCs are similar with that of NaErF<sub>4</sub> NCs except adding the corresponding precursors into the initial solution.

**Synthesis of NaErF<sub>4</sub>@NaYF<sub>4</sub> core-shell particles.** Y(Ac)<sub>3</sub> (0.8 mmol) and NaAc (0.8 mmol) was added into a 50 mL three-necked bottle containing OA (8 mL). The mixture was heated at 150 °C for 30 min to remove water from the solution. A solution of ODE (12 mL) was then quickly added and the resulted mixture was heated at 150 °C for another 30 min to form a clear solution, and then cooled down to 80 °C. Thereafter, the pre-prepared NaErF<sub>4</sub> core NCs in 4 mL cyclohexane was added to the above solution and kept at 110 °C for 40 min. After the removal of cyclohexane, 8 mL methanol solution containing NH<sub>4</sub>F (3 mmol) was added and the solution was stirred at 60 °C for 30 min. After the methanol was evaporated, the solution was further heated at 290 °C under N<sub>2</sub> for 120 min, and finally cooled down to room temperature.

**Synthesis of NaErF<sub>4</sub>@NaYF<sub>4</sub>@NaYbF<sub>4</sub>:0.5Tm core-shell-shell particles.** Yb(Ac)<sub>3</sub> (0.796 mmol), Tm(Ac)<sub>3</sub> (0.004 mmol) and NaAc (0.8 mmol) was added into a 50 mL three-necked bottle containing OA (8 mL). The mixture was heated at 150 °C for 30 min to remove water from the solution. A solution of ODE (12 mL) was then quickly added and the resulted mixture was heated at 150 °C for another 30 min to form a clear solution, and then cooled down to 80 °C. Thereafter, the pre-prepared NaErF<sub>4</sub>@NaYF<sub>4</sub> core-shell NCs in 4 mL cyclohexane was added to the above

solution and kept at 110 °C for 40 min. After the removal of cyclohexane, 8 mL methanol solution containing NH<sub>4</sub>F (3 mmol) was added and the solution was stirred at 60 °C for 30 min. After the methanol was evaporated, the solution was further heated at 290 °C under N<sub>2</sub> for 120 min, and finally cooled down to room temperature.

#### **Synthesis of NaErF<sub>4</sub>@NaYF<sub>4</sub>@NaYbF<sub>4</sub>:0.5Tm@NaYF<sub>4</sub> core-shell-shell particles.**

It is similar with that of NaErF<sub>4</sub>@NaYF<sub>4</sub> NCs except replacing NaErF<sub>4</sub> core by NaErF<sub>4</sub>@NaYF<sub>4</sub>@NaYbF<sub>4</sub>:0.5Tm core-shell-shell NCs.

#### **Calculation of the UC luminescence life-time**

The life-time of Er<sup>3+</sup>/Tm<sup>3+</sup> in Er@3S NCs can be fitted well by a bi-exponential function as

$$I = A_1 e^{-\frac{t}{\tau_1}} + A_2 e^{-\frac{t}{\tau_2}} \quad (1)$$

Where I is the UC luminescence intensity,  $A_1$  and  $A_2$  are constants, and  $\tau_1$  and  $\tau_2$  are the corresponding decay times. The mean lifetimes are calculated by the following equation:

$$\tau = \frac{A_1 \cdot \tau_1 + A_2 \cdot \tau_2}{A_1 + A_2}$$

(2)

#### **Figure S1-S13**

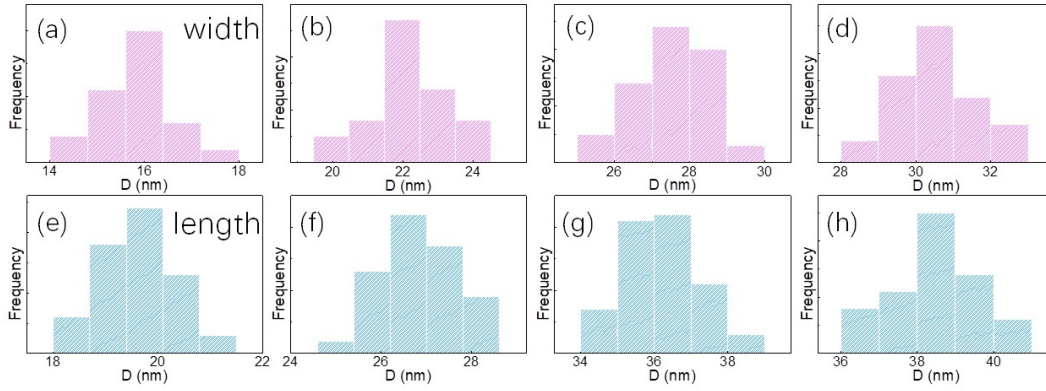

Figure S1 Size distributions of widths and lengths for the NaErF<sub>4</sub>:2Eu core (a, e), NaErF<sub>4</sub>:2Eu@NaYF<sub>4</sub> core-shell (b, f), NaErF<sub>4</sub>:2Eu@NaYF<sub>4</sub>@NaYbF<sub>4</sub>:0.5Tm core-shell-shell (c, g) and ErEu@3S core-shell-shell-shell (d, h) NCs, respectively.

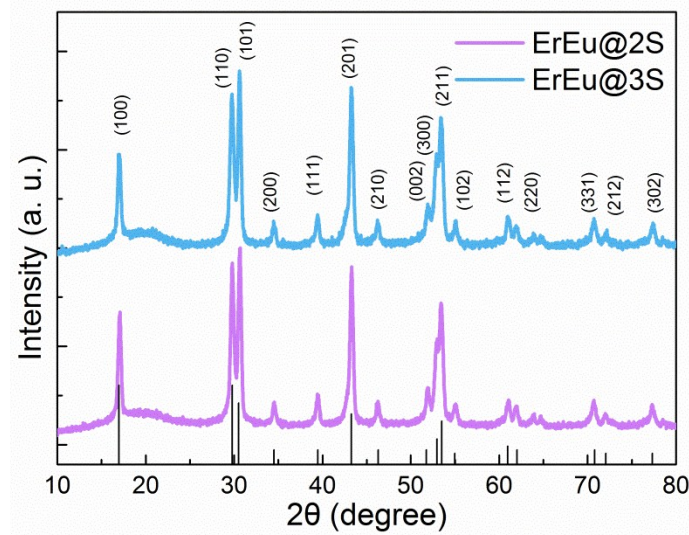

Figure S2 XRD patterns of NaErF<sub>4</sub>:2Eu@NaYF<sub>4</sub>@NaYbF<sub>4</sub>:0.5Tm core-shell-shell (ErEu@2S) and ErEu@3S NCs, respectively.

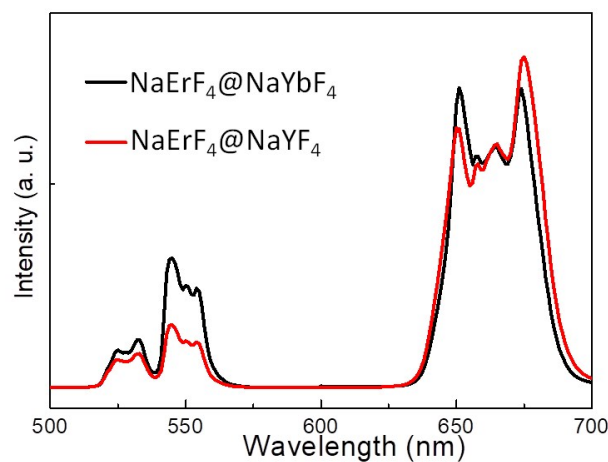

Figure S3 UC emission spectra of NaErF<sub>4</sub>@NaYbF<sub>4</sub> and NaErF<sub>4</sub>@NaYF<sub>4</sub> NCs under 980 nm laser excitation, which are normalized to 660 nm.

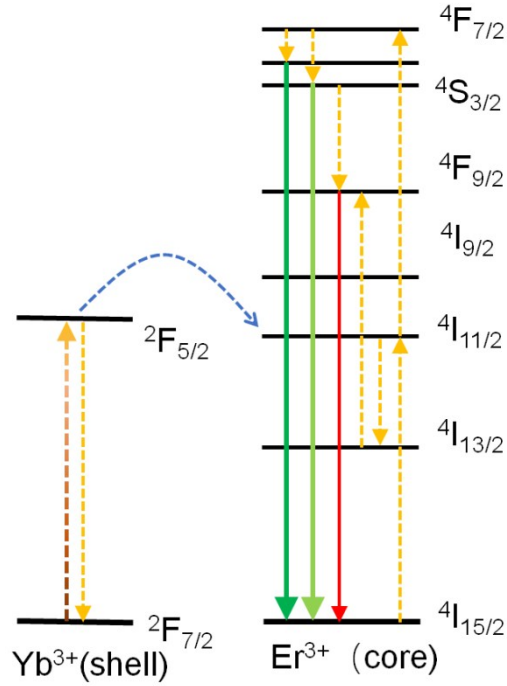

Figure S4 Proposed energy transfer mechanism in NaErF<sub>4</sub>@NaYbF<sub>4</sub> NCs.

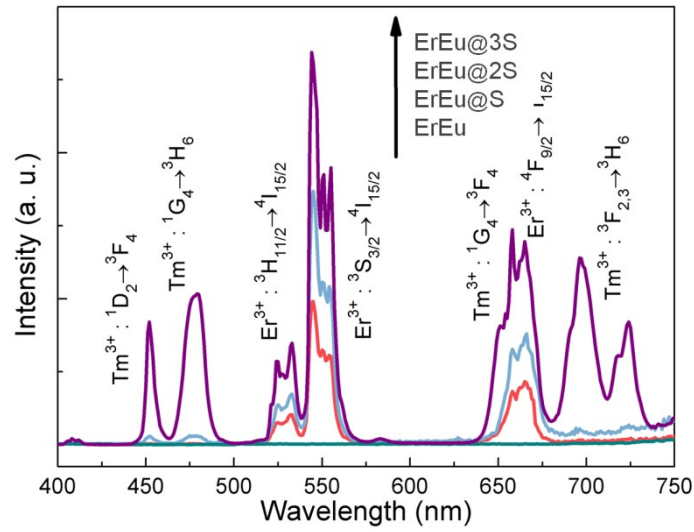

Figure S5 UC emission spectra of NaErF<sub>4</sub>:2Eu core (ErEu), NaErF<sub>4</sub>:2Eu@NaYF<sub>4</sub> core-shell (ErEu@S), NaErF<sub>4</sub>:2Eu@NaYF<sub>4</sub>@NaYbF<sub>4</sub>:0.5Tm core-shell-shell (ErEu@2S) and NaErF<sub>4</sub>:2Eu@NaYF<sub>4</sub>@NaYbF<sub>4</sub>:0.5Tm@NaYF<sub>4</sub> core-shell-shell-shell (ErEu@3S) NCs, respectively.

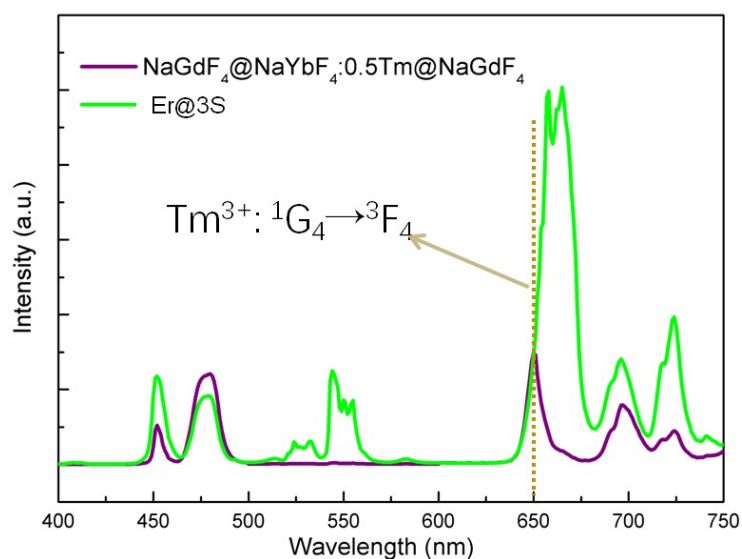

Figure S6 UC emission spectra of  $\text{NaGdF}_4@NaYbF_4:0.5Tm@NaGdF_4$  and  $\text{NaErF}_4@NaYF_4@NaYbF_4:0.5Tm@NaYF_4$  (Er@3S) NCs, respectively.

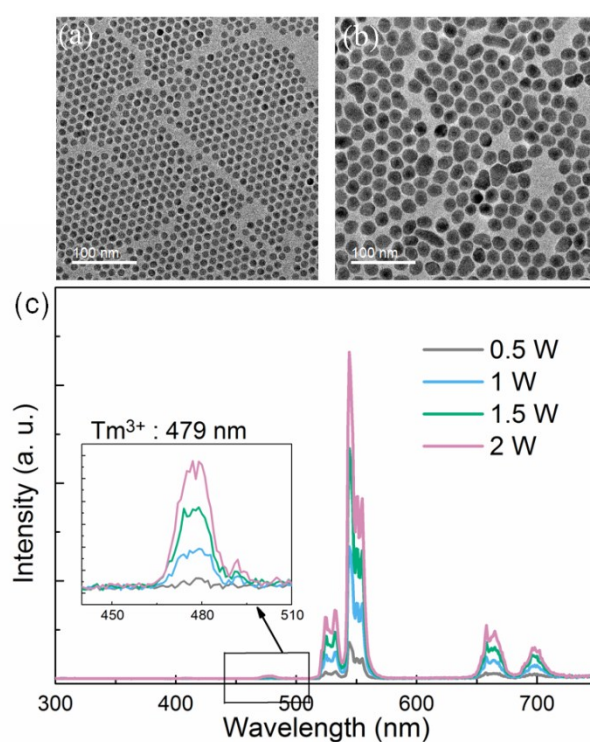

Figure S7 TEM images of  $\text{NaErF}_4: 2Eu$  (a) and  $\text{NaErF}_4: 2Eu@NaYF_4@NaYbF_4:0.5Tm@NaYF_4$  (b) NCs. (c) UC emission spectra of  $\text{NaErF}_4: 2Eu@NaYF_4@NaYbF_4:0.5Tm@NaYF_4$  NCs versus excitation power. Inserts of (c) is the enlarged spectra ranging from 440 to 510 nm.

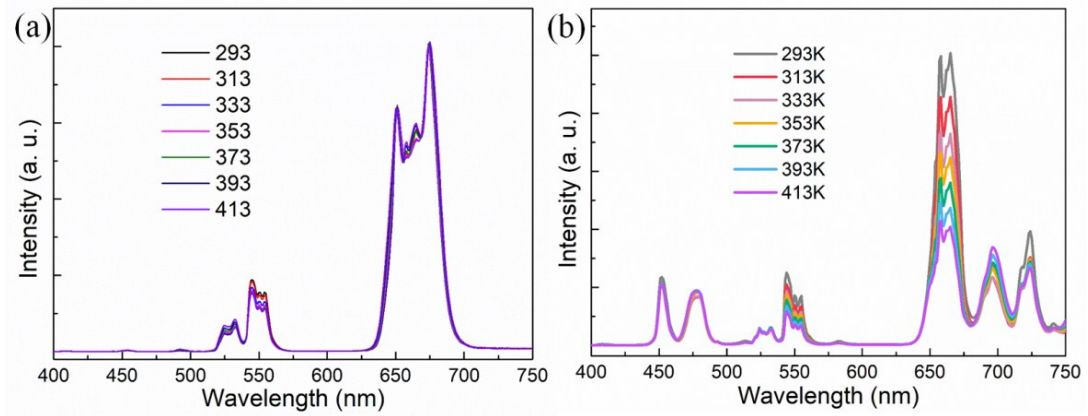

Figure S8 Temperature dependent UC emission spectra of NaErF<sub>4</sub>@NaYF<sub>4</sub> (a) and NaErF<sub>4</sub>@NaYF<sub>4</sub>@NaYbF<sub>4</sub>:0.5Tm@NaYF<sub>4</sub> NCs under 980 nm laser excitation.

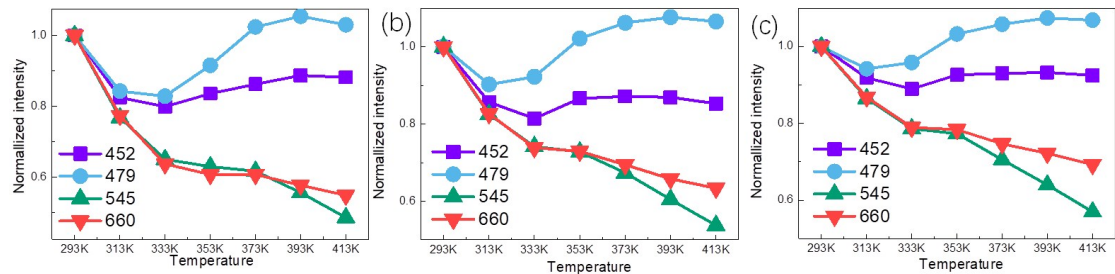

Figure S9 Temperature dependent UC emission intensity of different transitions in NaErF<sub>4</sub>@NaYF<sub>4</sub>@NaYbF<sub>4</sub>:0.5Tm@NaYF<sub>4</sub> NCs under 980 nm laser excitation at 100 mW (a), 200 mW (b) and 400 mW (c).

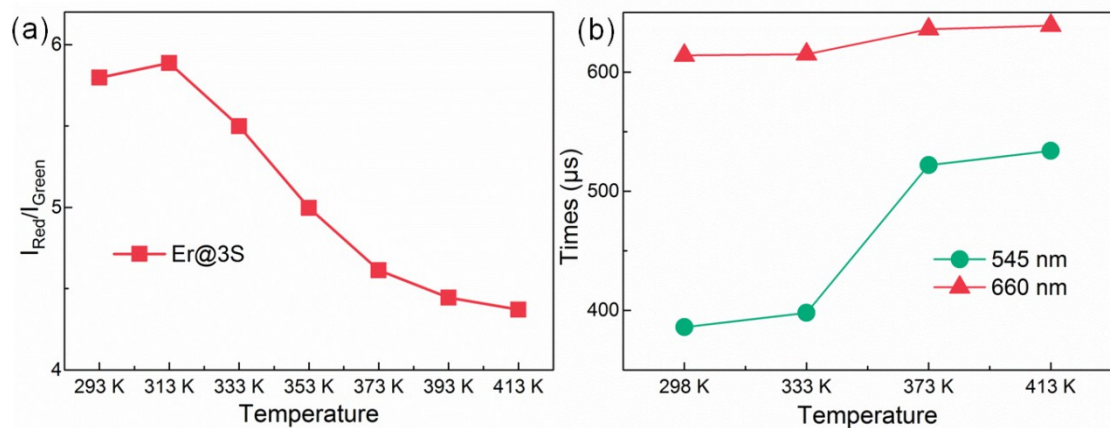

Figure S10 (a) UC emission intensity of red to green versus temperature. (b) life-time variation trends of green and red versus temperature.

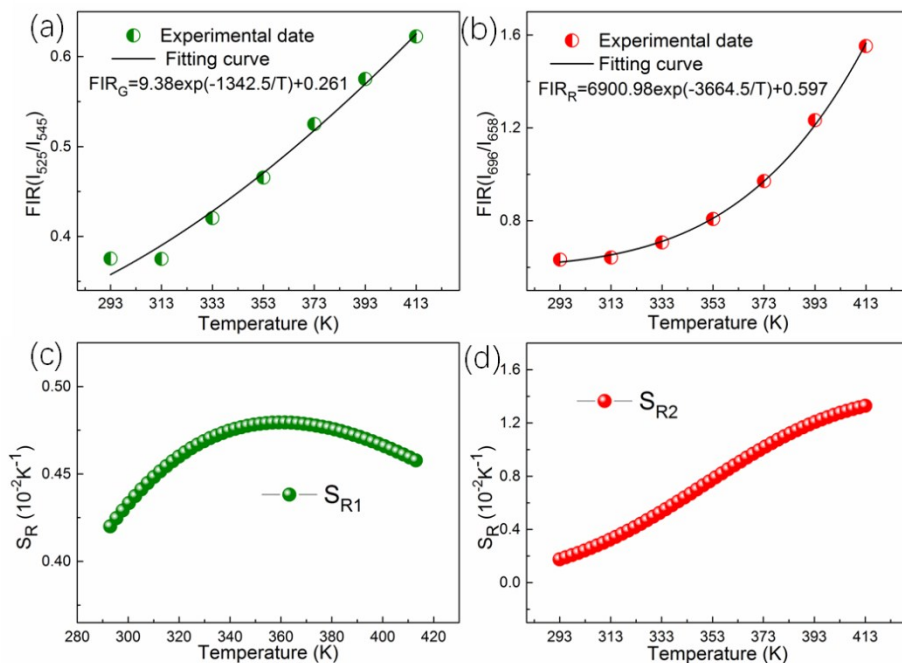

Figure S11 Dependence of FIR values on temperature in ErEu@3S NCs: (a)  $I_{525}/I_{545}$  and (b)  $I_{696}/I_{658}$ . The fitting curves are also provided. (c) and (d) are the dependence of relative sensitivities on absolute temperature corresponding to (a) and (b), respectively.

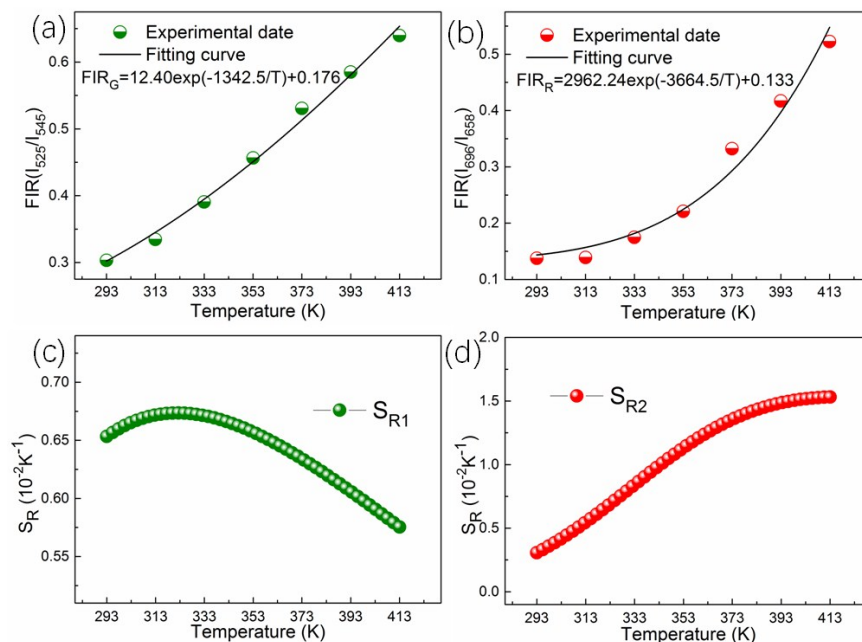

Figure S12 Dependence of FIR values on temperature in ErYb@3S NCs: (a)  $I_{525}/I_{545}$  and (b)  $I_{696}/I_{658}$ . The fitting curves are also provided. (c) and (d) are the dependence of relative sensitivities on absolute temperature corresponding to (a) and (b), respectively.



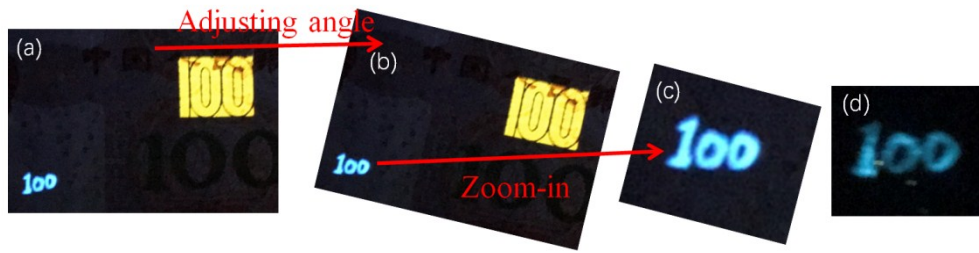

Figure S13 (a) Pattern of Figure 7d in the main-text. (b) angle-tuned of (a). (c) Zoom-in of the number “100” in (b). (d) Pattern of Figure 7e in the main-text.
